# Supplementary material for: Real time imaging of intra-axonal calcium flux in an explant mouse model of axonal Guillain-Barré syndrome
Source: PubMed Central journal article supplement (PMC7614209; doi:10.1016/j.expneurol.2022.114127), 2022-05-29
Supplement: EMS164618-supplement-Supplementary_1.pdf [file EMS164618-supplement-Supplementary_1.pdf]

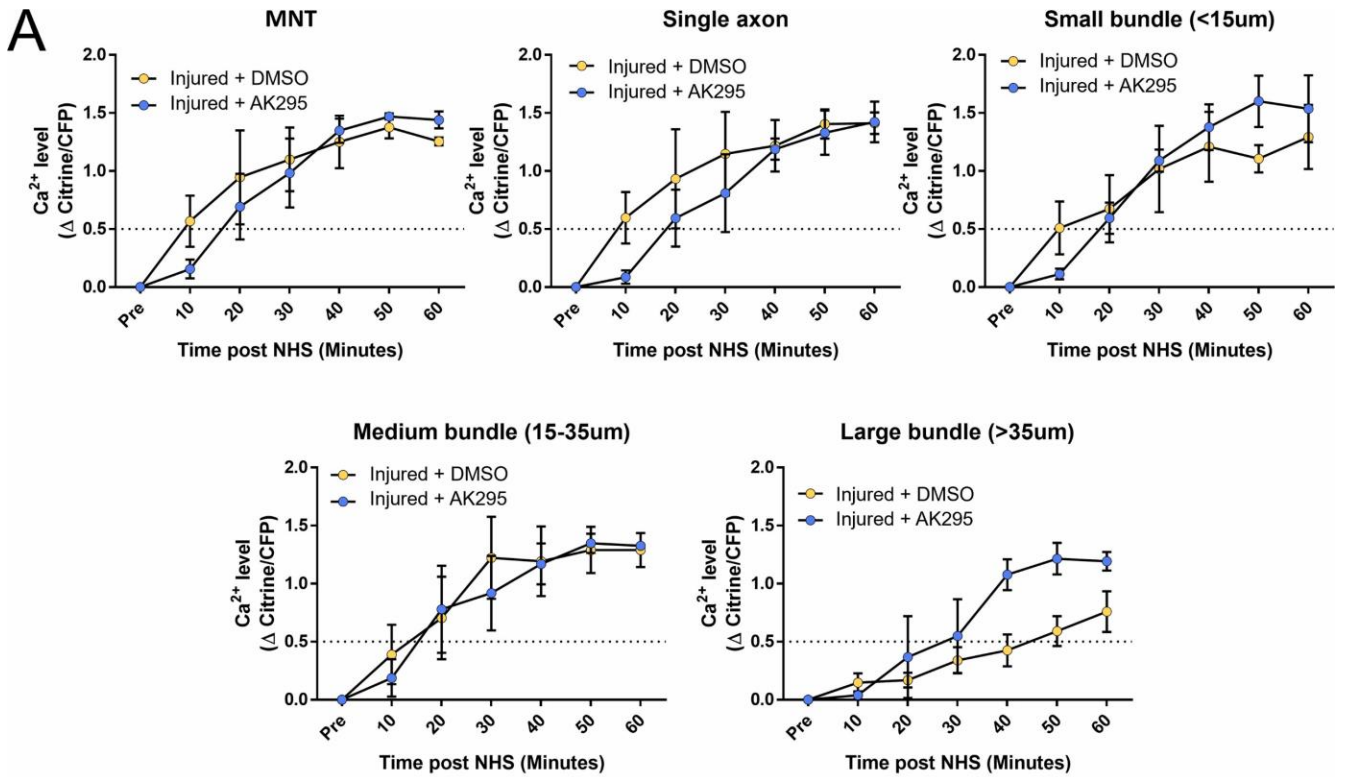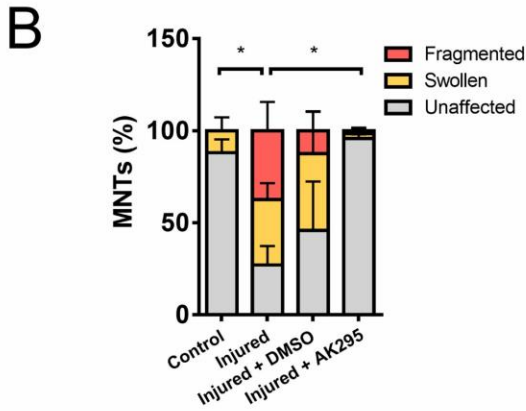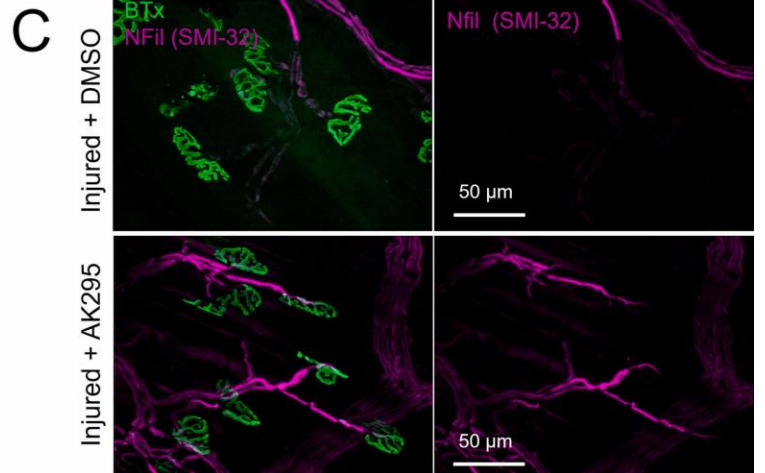

Supplementary 1. A: Changes in calcium ( $\Delta$  Citrine/CFP) over time in explants which received injury with Ab+NHS with the addition of either AK295 or DMSO vehicle control. No significant differences were observed between groups (two-way repeated measures ANOVA with Sidak's multiple comparisons test). B: Morphological changes at the MNTs in each experimental group at 60 min. \* = unaffected ( $p < 0.05$ ), two-way ANOVA with Tukey's multiple comparisons test.  $n = 3$  control,  $n = 4$  Injury,  $n = 4$  Injured+DMSO,  $n = 3$  Injured+AK295. C. Illustrative images showing SMI-32 immunostaining for non-phosphorylated Nfil-H. A similar loss of staining is seen as with antibody for phosphorylated Nfil-H, in injured preparations with DMSO vehicle. In AK295-treated explants, SMI32 staining was protected.
